# Supplementary material for: An On-Demand pH-Sensitive Nanocluster for Cancer Treatment by Combining Photothermal Therapy and Chemotherapy
Source: MDPI journal article supplement (doi:10.3390/pharmaceutics12090839), 2020-09-02
Supplement: s1 [file s1]

# Supplementary Material: An On-Demand pH-Sensitive Nanocluster for Cancer Treatment by Combining Photothermal Therapy and Chemotherapy

Taehoon Sim, Chaemin Lim, Ngoc Ha Hoang, Yuseon Shin, Jae Chang Kim, June Yong Park, Jaewon Her, Eun Seong Lee, Yu Seok Youn, and Kyung Taek Oh

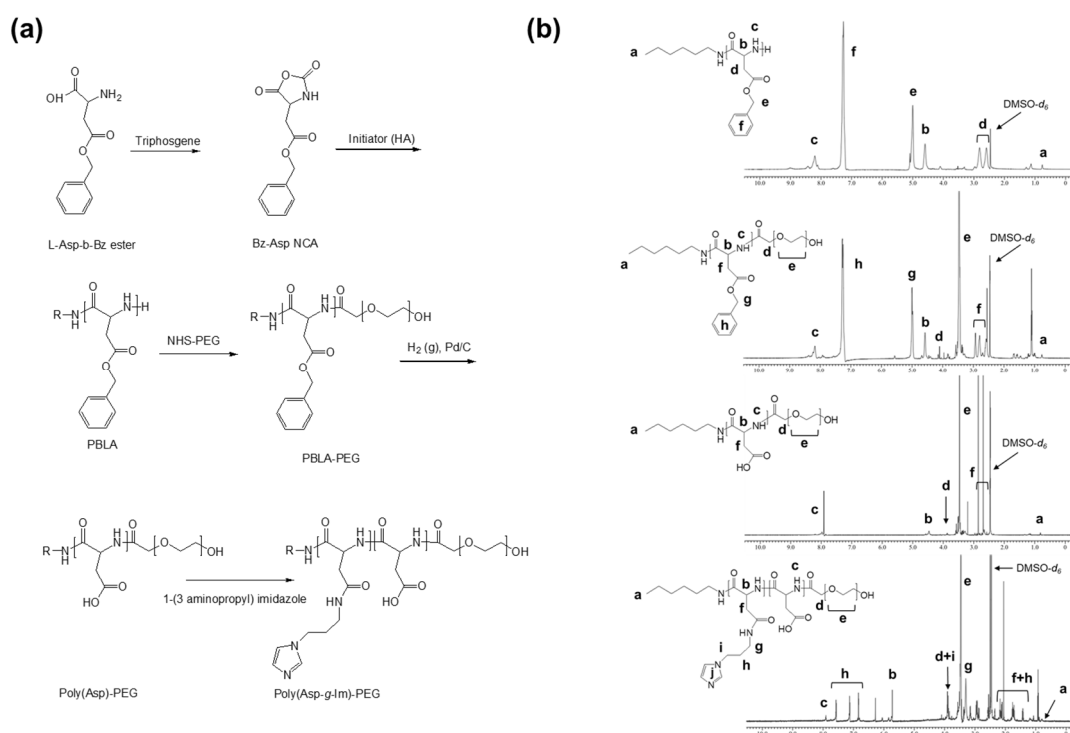

**Figure S1.** Chemical synthesis route and structural analysis of Poly(Asp-g-Im)-PEG (PAIM-PEG) by <sup>1</sup>H-NMR analysis.

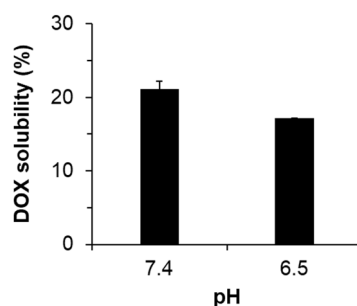

**Figure S2.** Solubility of Doxorubicin (DOX) in PBS at pH 7.4 and 6.5.

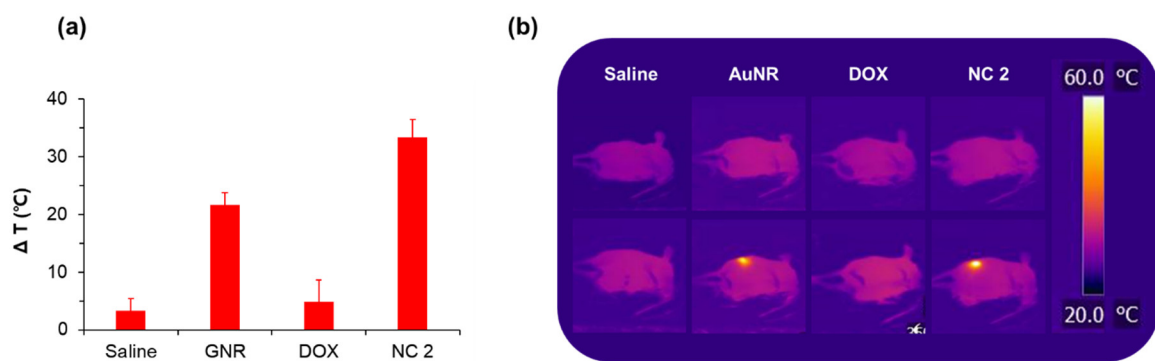

**Figure S3.** in vivo photothermal effect at the tumor site by the irradiation of NIR laser (808 nm, 1 min, 2 W/cm<sup>2</sup>).
